# Supplementary material
Source: PubMed Central journal article supplement (PMC2529041)
Supplement: 0801728105_0801728105SI.pdf [file 0801728105_0801728105SI.pdf]

# Supporting Information

Doyle et al. 10.1073/pnas.0801728105

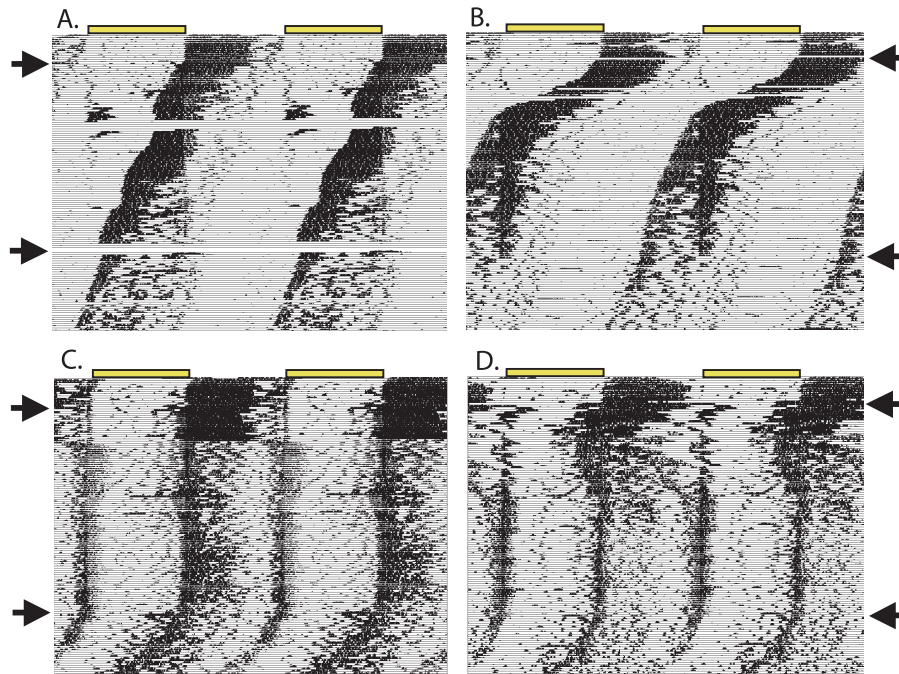

**Fig. S1.** Double-plotted wheel-running records from individual C57BL/6J mice that showed relative coordination of activity to the light phase in a dim-light:dark cycle (*A* and *B*) or smaller changes in phase angle accompanied by increases in activity at light:dark transitions (*C* and *D*). For the first 2 weeks of each record, animals were housed in a  $150 \mu\text{W}/\text{cm}^2$  12-hour light:12-hour dark cycle. On the days indicated by the upper arrows, the light intensity during the light phase was reduced to  $0.0001 \mu\text{W}/\text{cm}^2$ . On the days indicated by the lower arrows, mice were released into constant darkness.
